# Supplementary material
Source: PubMed Central journal article supplement (PMC9442313)
Supplement: EMBR-23-e53234-s002.pdf [file EMBR-23-e53234-s002.pdf]

## **Appendix:**

### **Lysosomal K<sup>+</sup> Channel TMEM175 Promotes Apoptosis and Aggravates Symptoms of Parkinson's Disease**

Lili Qu, Bingqian Lin, Wenping Zeng, Chunhong Fan, Haotian Wu, Yushu Ge, Qianqian Li, Canjun Li, Yanan Wei, Jing Xin, Xingbing Wang, Dan Liu, and Chunlei Cang

#### **Table of contents**

**Appendix Figure S1**

**Appendix Figure S2**

**Appendix Figure S3**

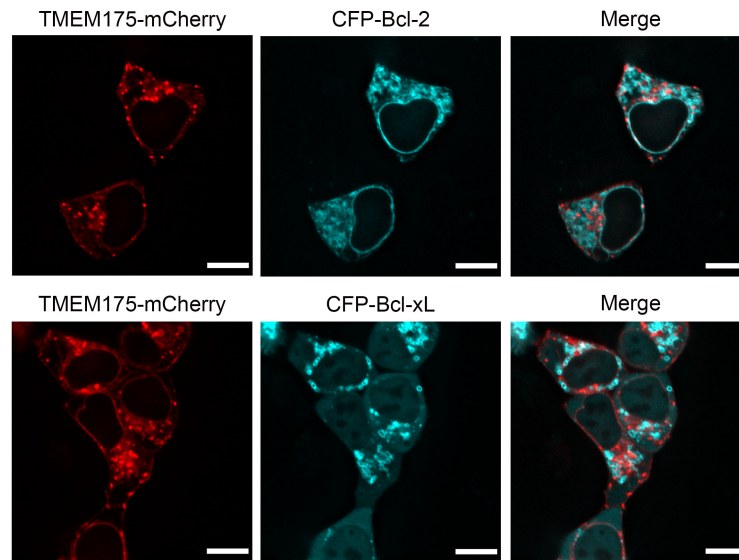

**Appendix Figure S1. Localization patterns of mCherry-tagged TMEM175 and CFP-tagged Bcl-2 (upper row) or CFP-tagged Bcl-xL (lower row) in HEK293T cells. Scale bars = 10  $\mu$ m**

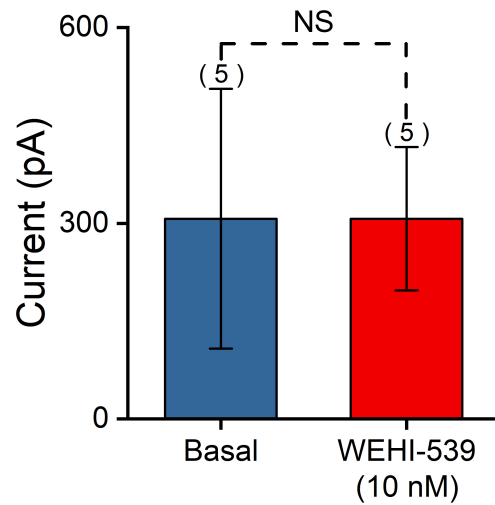

**Appendix Figure S2. Whole cell TMEM175 currents recorded before (basal) and 20 min after application of 10 nM WEHI-539.** The currents were elicited with a ramp protocol (-100 to +100 mV in 1 s, every 10 s,  $V_h = 0$  mV) and measured at -100 mV.

Data information: The data are presented as the mean  $\pm$  SEM. Statistical significance was analyzed with two-sided student's t-tests and is indicated with NS for not significant ( $P > 0.05$ ). n value means the number of biological replicates made for each data point.

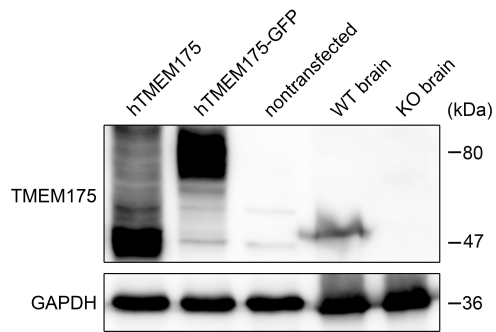

**Appendix Figure S3. Validation of TMEM175 antibody and TMEM175-knockout mice.** Immunoblots of HEK293T cells and mouse brains using the TMEM175 antibody (Proteintech, 19925-1-AP). Samples (from left to right): hTMEM175-transfected HEK293T cells, hTMEM175-GFP-transfected HEK293T cells, nontransfected HEK293T cells, brain of a WT mouse and brain of a TMEM175-KO mouse.
